# Supplementary material for: Qualitative Analysis of a Twitter-Disseminated Survey Reveals New Patient Perspectives on the Impact of Urinary Tract Infection
Source: Antibiotics (Basel). 2022 Nov 23;11(12):1687. doi: 10.3390/antibiotics11121687 (PMC9774672; doi:10.3390/antibiotics11121687)
Supplement: Supplementary file 1 [file antibiotics-11-01687-s001.zip › antibiotics-1971665-supplementary.pdf]

# UTIGA Codebook

| Code Name              | Description                                                         | References |
|------------------------|---------------------------------------------------------------------|------------|
| Q1. Dependency         |                                                                     | 1          |
| Antibiotics            |                                                                     | 31         |
| Bathroom               |                                                                     | 66         |
| Medical system         |                                                                     | 9          |
| Dependency Sum         |                                                                     | 107        |
| Q1. Diagnosis          |                                                                     |            |
| Chronic UTI            |                                                                     | 85         |
| Interstitial cystitis  |                                                                     | 12         |
| Recurrence             |                                                                     | 43         |
| Q1. Economic Impact    |                                                                     | 5          |
| Healthcare costs       |                                                                     | 24         |
| Income loss            | Only if specifically mentioned, not implied from listing 'job loss' | 7          |
| Economic Sum           |                                                                     | 36         |
| Q1. Limitations-Impact |                                                                     | 16         |
| Diet                   | Eating/drinking habits                                              | 38         |
| Exercise               |                                                                     | 40         |
| Overall functioning    | Includes impact on general activities/activities of daily living    | 113        |
| Sleep                  |                                                                     | 40         |
| Travel                 | Travel and ability to be away from the house                        | 21         |
| Doctors appts          |                                                                     | 6          |

| Code Name             | Description                                          | References |
|-----------------------|------------------------------------------------------|------------|
| Leave the house       |                                                      | 51         |
| Travel for pleasure   |                                                      | 8          |
| Unpredictability      |                                                      | 56         |
| Work/School           | Ability to work and job performance                  | 82         |
| Career-promotion loss |                                                      | 30         |
| Sum Work/school       |                                                      | 112        |
| Q1. Mental health     |                                                      | 66         |
| Anxiety               | Includes 'worry'                                     | 72         |
| Depression            |                                                      | 50         |
| Suicidal Ideation     |                                                      | 29         |
| Distress              | more extreme than stress, with desperation component | 15         |
| Embarrassment         |                                                      | 11         |
| Fear                  |                                                      | 41         |
| Frustration           |                                                      | 45         |
| Lowered self-esteem   |                                                      | 8          |
| Resignation           |                                                      | 3          |
| Stigma                | Related to chronic-pain                              | 3          |
| Stress                |                                                      | 17         |
| Q1. Quality of life   |                                                      | 9          |
| Consuming             |                                                      | 41         |
| Moderate              |                                                      | 27         |
| Severe                |                                                      | 51         |

| Code Name                | Description                                                               | References |
|--------------------------|---------------------------------------------------------------------------|------------|
| Sum of Quality of Life   |                                                                           | 128        |
| Q1. Physical health      |                                                                           | 28         |
| Fatigue                  |                                                                           | 27         |
| Malaise                  | Unwell                                                                    | 15         |
| Weight gain              |                                                                           | 5          |
| Pain                     | If not directly in reference to UTI symptoms                              | 123        |
| Location                 |                                                                           | 10         |
| Severity                 |                                                                           | 54         |
| Type                     |                                                                           | 0          |
| Acute                    |                                                                           | 6          |
| Chronic                  |                                                                           | 89         |
| Sum pain                 |                                                                           | 282        |
| Q1. UTI Complications    |                                                                           | 7          |
| Ability to have children |                                                                           | 13         |
| Hospitalization          |                                                                           | 11         |
| Miscarriage              | Due to infection                                                          | 3          |
| Sepsis                   |                                                                           | 3          |
| Q1. Sexual health        |                                                                           | 69         |
| Q1. Social health        |                                                                           | 27         |
| Enjoyment                | Includes general reference to 'holiday' but excludes 'travel for holiday' | 28         |
| Family or home life      |                                                                           | 51         |
| Spouse/significant other | Impact on relationship with spouse                                        | 31         |

| Code Name                         | Description                                                                         | References |
|-----------------------------------|-------------------------------------------------------------------------------------|------------|
| Personal relationships            |                                                                                     | 54         |
| Sum of social health              |                                                                                     | 191        |
| Q1. UTI Symptoms                  |                                                                                     | 43         |
| Bladder pain-pressure             |                                                                                     | 26         |
| Dysuria                           |                                                                                     | 19         |
| Frequency                         |                                                                                     | 41         |
| Incontinence                      |                                                                                     | 6          |
| Other                             |                                                                                     | 18         |
| Rigors or chills                  |                                                                                     | 1          |
| Urgency                           |                                                                                     | 20         |
| Q1. Treatment experience          |                                                                                     | 52         |
| Antibiotics                       |                                                                                     | 68         |
| Antibiotic side effects           |                                                                                     | 26         |
| Duration                          |                                                                                     | 92         |
| Long-term                         |                                                                                     | 28         |
| Prescription hesitancy            | This captures unwillingness of doctors/fear of prescribing longer term antibiotics. | 4          |
| Antibiotic Resistance             |                                                                                     | 28         |
| Limited medications for treatment |                                                                                     | 13         |
| Medical system                    | Negative experience                                                                 | 19         |
| Recurrence                        | Recurrence or treatment failure                                                     | 16         |
| Recurrence-chronic UTI            | Recurrence or treatment failure, chronic UTI, embedded UTI                          | 48         |
| TVT Mesh                          |                                                                                     | 12         |

| Code Name                                 | Description                                                                                                                                                            | References |
|-------------------------------------------|------------------------------------------------------------------------------------------------------------------------------------------------------------------------|------------|
| Uncertainty of cure                       |                                                                                                                                                                        | 29         |
| Unclear results                           |                                                                                                                                                                        | 25         |
| Q2. Clinician experience                  |                                                                                                                                                                        | 28         |
| Inadequate management or care             | Examples in terms of diagnosis and/or treatment, not ordering appropriate diagnostics, not treating appropriately, more thorough diagnostics/workup, lack of follow-up | 129        |
| Interaction                               | Includes dismissive, lack of listening, not believing                                                                                                                  | 153        |
| Empathy                                   |                                                                                                                                                                        | 9          |
| Sum Interaction/Empathy                   |                                                                                                                                                                        | 162        |
| Named provider                            | If respondent specifically names a certain doctor                                                                                                                      | 26         |
| No belief in embedded                     |                                                                                                                                                                        | 16         |
| Not treating symptoms                     |                                                                                                                                                                        | 21         |
| Stewardship-AMR-fears                     |                                                                                                                                                                        | 11         |
| Q2. Accessibility                         | For tests, appointments, clinicians, travel distances, timeliness of access                                                                                            |            |
| Diagnostics or treatment                  |                                                                                                                                                                        | 42         |
| Chronic UTI Specialist                    |                                                                                                                                                                        | 43         |
| Timeliness                                |                                                                                                                                                                        | 15         |
| Travel                                    |                                                                                                                                                                        | 12         |
| Q2. Awareness-Knowledge-Beliefs           | In general                                                                                                                                                             | 22         |
| Doctors-medical system                    | Lack of knowledge and or awareness; general UTI                                                                                                                        | 109        |
| Acknowledge UTI or condition as important | Take seriously, value, respect                                                                                                                                         | 55         |
| Chronic UTI                               | general                                                                                                                                                                | 2          |
| Disbelief in chronic UTI                  |                                                                                                                                                                        | 13         |

| Code Name                                                      | Description                                                                                            | References |
|----------------------------------------------------------------|--------------------------------------------------------------------------------------------------------|------------|
| Lack of chronic UTI knowledge                                  |                                                                                                        | 33         |
| Incorporating current research or treatment                    | Accepting, entertaining, acknowledging new research                                                    | 11         |
| Initiating own research; digging deeper into patient diagnosis |                                                                                                        | 10         |
| Knowledge related to testing inaccuracies                      |                                                                                                        | 28         |
| Sum UTI knowledge doctors/medical sys.                         |                                                                                                        | 184        |
| Scientists                                                     |                                                                                                        | 4          |
| Personal                                                       |                                                                                                        | 17         |
| Public                                                         |                                                                                                        | 16         |
| Q2/Q3. Women's health issue                                    | Neglected area due to women's health issue                                                             | 52         |
| Q2/Q3. Combined Guidelines                                     | Shortcomings of UTI guidelines                                                                         | 52         |
| Q3. Diagnostics                                                |                                                                                                        | 115        |
| PCR testing                                                    |                                                                                                        | 4          |
| Standard urine culture                                         |                                                                                                        | 24         |
| Sum Diagnostics                                                | Shortcomings                                                                                           | 143        |
| Misdiagnosis with IC or other cond.                            |                                                                                                        | 21         |
| Q3. Research                                                   |                                                                                                        | 53         |
| Impact on quality of life                                      | Research on QoL but also general statements about QoL impacts                                          | 38         |
| Menopause                                                      | With respect to UTI                                                                                    | 5          |
| Acceptance of chronic UTI as dx                                | Acceptance/recognition as a diagnosis and treatment and or more research to 'prove' chronic UTI exists | 17         |
| General Research on Chronic UTI                                |                                                                                                        | 38         |
| Mechanistic causes of Chronic UTI                              | Genetic, microbiome, causative organisms, acute vs chronic                                             | 15         |

| Code Name                                | Description                                                             | References |
|------------------------------------------|-------------------------------------------------------------------------|------------|
| Sum of Mechanistic + general chronic UTI |                                                                         | 52         |
| Microbiome-Urobiome                      |                                                                         | 18         |
| Pathophysiology                          | General pathophysiology category                                        | 28         |
| Questions about UTI                      | Or biofilms, recurrent UTI Or statements related to lack of information | 10         |
| Vaginal Mesh                             |                                                                         | 9          |
| Q3. Support-Encouragement-Imploring help |                                                                         | 125        |
| Q3. Treatment                            |                                                                         | 107        |
| Chronic UTI Tx                           |                                                                         | 38         |
| Cure                                     |                                                                         | 48         |
| Duration                                 |                                                                         | 4          |
| Natural remedies                         |                                                                         | 5          |
| Pain treatment                           |                                                                         | 12         |
| Prevention                               |                                                                         | 20         |
| Targeted bladder wall treatment          |                                                                         | 9          |
| Vaccine                                  |                                                                         | 4          |
